# Supplementary material
Source: MDPI journal article supplement (https://www.mdpi.com/2571-8789/2/2/32)
Supplement: s1 [file s1]

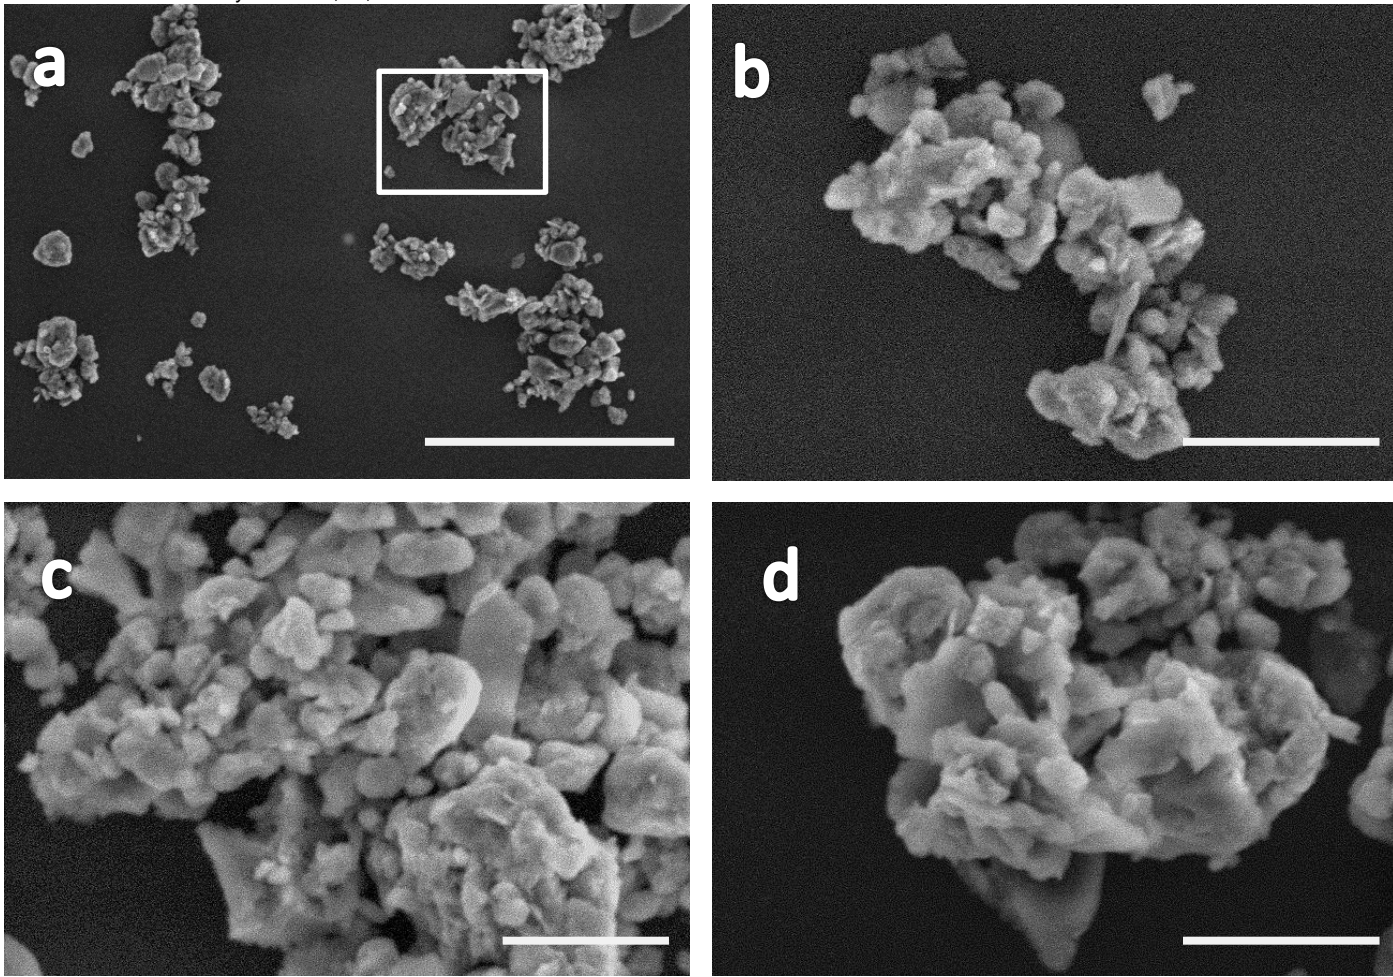

FigureS1

SEM images of 0.2-2 $\mu$ m size fraction dispersed on Si<sub>3</sub>N<sub>4</sub> window .

(a)white square showed tested particle. (b, c, d) Magnified images of other particles .

Scale bar is equal to 10 $\mu$ m in (a), 2  $\mu$ m in (b), (c) , and (d).

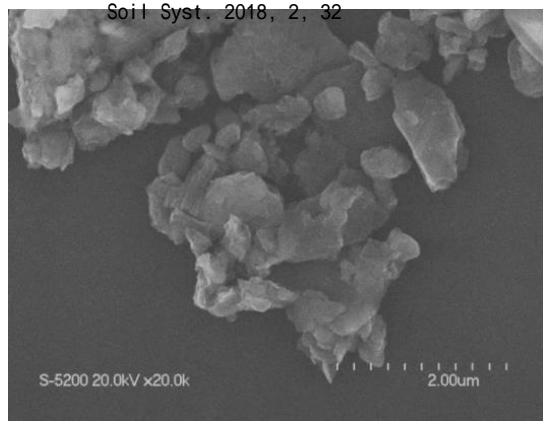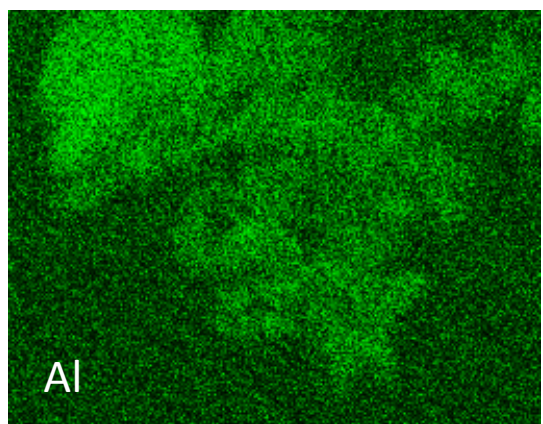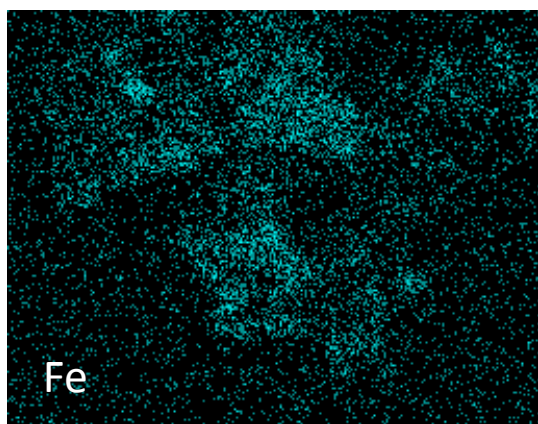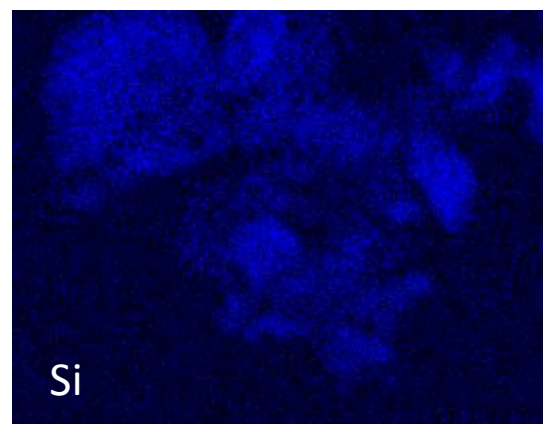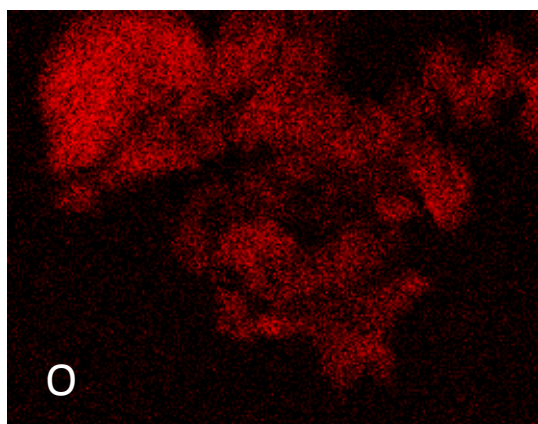

FigureS2 Elemental maps by SEM-EDX

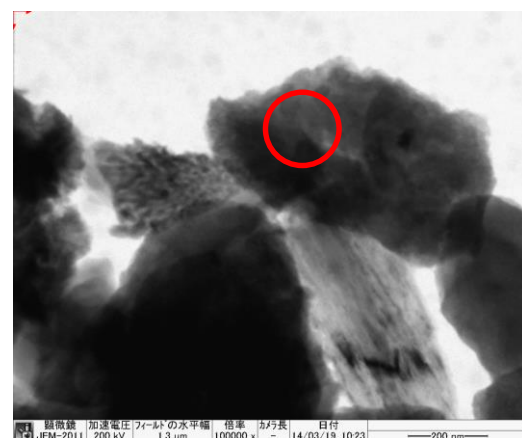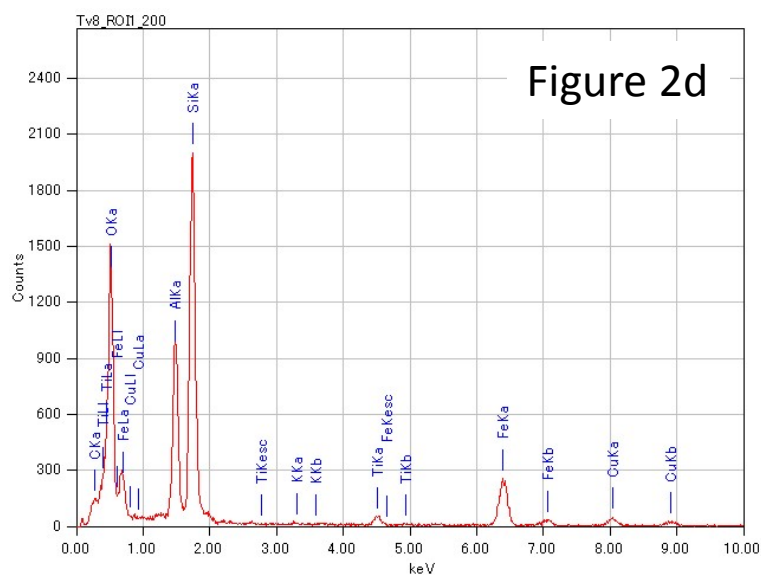

FigureS3 TEM-EDX spectrum obtained from same area in Figure2b, 2c, and 2d.
